# Supplementary material for: Identification of Neotropical Culex Mosquitoes by MALDI-TOF MS Profiling
Source: Preprints.org preprint supplement (doi:10.20944/preprints202302.0141.v1), 2023-02-08
Supplement: Supplementary file 8 [file Additional_file S4.docx]

**Additional file S4.** Top-five mass peak list per mosquito speciesusing legs.

|  |  | Average peak intensity (a.u.)* | | | | | | | | | | |
| --- | --- | --- | --- | --- | --- | --- | --- | --- | --- | --- | --- | --- |
| **MS peak number§** | **m/z (Da)** | ***Cx. declarator*** | ***Cx. dunni*** | ***Cx. eastor*** | ***Cx. idottus*** | ***Cx. nigripalpus*** | ***Cx. pedroi*** | ***Cx. portesi*** | ***Cx. quinquefasciatus*** | ***Cx. rabanicolus*** | ***Cx. spissipes*** | ***Cx. usquatus*** |
| 1 | 2952.56 | 3.28 | **9.56** | 8.07 | 5.35 | 4.54 | 7.61 | 5.13 | 2.55 | 9.58 | 3.54 | 2.35 |
| 2 | 3108.38 | **9.41** | **10.95** | **12.12** | **7.56** | 7.31 | **9.63** | **10.94** | 4.51 | 8.82 | **10.24** | 4.23 |
| 3 | 3125.26 | 4.48 | **9.35** | 6.14 | 6.45 | 4.89 | **13.4** | 5.49 | 4.7 | **12.39** | 6.72 | 3.38 |
| 4 | 3136.01 | 6.4 | 5.43 | 5.93 | 7.16 | **18.87** | 5.62 | 4.97 | 2.65 | 7.37 | 4.75 | 7.36 |
| 5 | 3443.81 | 6.09 | 8.27 | 7.58 | 5.32 | 11.06 | **14.45** | 6.87 | 2.87 | 8.62 | 3.55 | 2.77 |
| 6 | 4073.42 | 3.47 | 7.8 | 10.18 | **9.47** | 4.52 | 3.56 | 3.11 | 3.31 | 5.47 | 5.6 | 2.66 |
| 7 | 4099.27 | 4.21 | 5.36 | 4.64 | 4.12 | 9.42 | 5.74 | 3.91 | **12.16** | 5.9 | 2.44 | 3.68 |
| 8 | 4283.69 | 8.89 | 8.95 | **10.63** | **7.28** | 8.47 | 7.32 | 5.69 | 8.04 | 5.75 | 5.19 | **12.81** |
| 9 | 4532.03 | 4.98 | 8.1 | **12.9** | **10.5** | 5.66 | 3.07 | 3.76 | 5.64 | **11.9** | 5.12 | 5.38 |
| 10 | 4563.79 | 3.56 | **29.32** | **17.56** | 2.76 | 5.65 | **10.57** | 4.91 | 3.29 | **14.82** | 5.08 | 3.72 |
| 11 | 4590.63 | 3.29 | 5.77 | 4.41 | 2.26 | 2.45 | 6.1 | **31.4** | 1.76 | 5.35 | **15.83** | 2.41 |
| 12 | 4606.79 | 2.65 | 4.22 | 4 | 2.4 | 1.66 | **31.48** | 8.17 | 1.49 | 2.31 | 5.21 | 1.61 |
| 13 | 4686.19 | **16.14** | 1.97 | 1.87 | 2.24 | **16.86** | 1.79 | 1.68 | **34.52** | 1.61 | 2.01 | 2.64 |
| 14 | 4695 | **17.73** | 2.52 | 2.16 | 2.45 | **25.77** | 1.42 | 1.93 | **8.32** | 1.88 | 1.63 | 2.94 |
| 15 | 4721.48 | **30.21** | 2.8 | 2.55 | 4.24 | **17.64** | 2.12 | 1.83 | 5.13 | 3 | 2.22 | **10.36** |
| 16 | 4819.94 | 5.24 | **14.05** | **10.78** | 2.33 | 5.06 | 4.76 | 6.17 | **10.43** | 2.65 | 2.06 | 7.43 |
| 17 | 4933.81 | 5.23 | 4.22 | 5.21 | 2.09 | 3.96 | 3.94 | 4.19 | 1.8 | 2.67 | **17.72** | 3.87 |
| 18 | 4974.12 | 1.85 | 1.87 | 2.09 | **11.15** | 3.34 | 1.62 | 1.69 | 4.06 | **15.83** | 2.14 | 6.51 |
| 19 | 5206.88# | **12.73** | 2.15 | 3.09 | 2.15 | **14** | 3.42 | 7.35 | 7.33 | 3.95 | 2.25 | 4.97 |
| 20 | 5405.69# | 2.16 | 8.2 | 9.42 | 6.26 | 1.8 | 1.59 | **9.17** | 1.28 | 6.16 | 1.56 | 4.35 |
| 21 | 5495.25 | 3.32 | 4.92 | 5.88 | 3.55 | 2.62 | 5.86 | **11.26** | 3.3 | 4.89 | 6.45 | 3.12 |
| 22 | 5616.4 | 2.28 | 1.46 | 1.44 | 2.42 | 1.28 | 1.95 | **14.95** | 2.47 | 2.11 | 2.24 | 1.53 |
| 23 | 6427.33# | 3.13 | 1.53 | 1.64 | 1.39 | 1.7 | 4.74 | 2.76 | **12.08** | 1.1 | 0.83 | 2.35 |
| 24 | 6811.21 | 7.1 | 1.13 | 1.19 | 1.09 | 6.52 | 3.92 | 3.66 | 6.01 | 0.8 | 1.02 | **9.51** |
| 25 | 7447.78 | 5.27 | 1.5 | 0.96 | 1.45 | 7.02 | 0.92 | 1.15 | 7.7 | 1.15 | 1.56 | **19.05** |
| 26 | 7856.69 | 4.96 | 5.73 | 6.41 | 2.9 | 4.78 | 6.33 | 5.05 | 5.58 | 4.78 | **10.19** | 2.63 |
| 27 | 8232.11 | 5.33 | 1.39 | 1.31 | 0.92 | 1.53 | 0.77 | 1.52 | 7.38 | 0.66 | 2.07 | **8.78** |
| 28 | 8658.23 | 2.95 | 0.91 | 0.99 | 1.86 | 1.73 | 0.87 | 1.43 | 3.57 | **10.6** | 1.2 | 1.26 |
| 29 | 8801.36 | 0.62 | 0.67 | 0.69 | 1.1 | 0.5 | 0.58 | 1.48 | 0.68 | 1.65 | **8.73** | 0.69 |

§List of MS peaks used to distinct *Culex* species based on the Genetic Algorithm model analysis of ClinProTools. *The top-five mass peaks per *Culex* species are indicated in bold. #MS peaks for which mass-to-charge ratio (m/z) were similar with thorax top-five MS peak list (see Additional file S4). Da: Daltons; m/z: mass to charge; a.u.: arbitrary unit.
