# Supplementary material for: Identification of Neotropical Culex Mosquitoes by MALDI-TOF MS Profiling
Source: Preprints.org preprint supplement (doi:10.20944/preprints202302.0141.v1), 2023-02-08
Supplement: Supplementary file 20 [file Additional_file S1.xlsx]

## Sheet: Feuil1
MS system used	Genus	Sub-genus	Species	Subspecies	Strain	Sample name	Arthropod type	Body part	Developmental stage	Geographical origin (country)	Geographical origin (city/aera)	Homogeneization mode (apparatus)	Homogeneization mode (medium)	Storing mode	Storing duration (months)	Matrix	Number of spectra used to create MSP	Gene sequenced	BOLD Accession number	Identity (%)	Coverage (%)	Museum ID
LT Microflex Bruker	Culex	Melanoconion	adamesi			Culex_adamesi_PA 2	Mosquito	legs	Adult	France overseas	French Guiana	TissueLyser	Glass beads	-20°C		HCCA	4	COI	FGMOS2220-20	0.968	0.99	ST11335
LT Microflex Bruker	Culex	Melanoconion	adamesi			Culex_adamesi_TH 2	Mosquito	thorax	Adult	France overseas	French Guiana	TissueLyser	Glass beads	-20°C		HCCA	4	COI	FGMOS2220-20	0.968	0.99	ST11335
LT Microflex Bruker	Culex	Culex	declarator			Culex_declarator_PA 104	Mosquito	legs	Adult	France overseas	French Guiana	TissueLyser	Glass beads	-20°C		HCCA	4	COI	FGMOS2272-20	0.9939	1	ST11396
LT Microflex Bruker	Culex	Culex	declarator			Culex_declarator_TH 104	Mosquito	thorax	Adult	France overseas	French Guiana	TissueLyser	Glass beads	-20°C		HCCA	4	COI	FGMOS2272-20	0.9939	1	ST11396
LT Microflex Bruker	Culex	Culex	declarator			Culex_declarator_TH 99	Mosquito	thorax	Adult	France overseas	French Guiana	TissueLyser	Glass beads	-20°C		HCCA	4	COI	FGMOS2272-20	0.9954	1	ST11396
LT Microflex Bruker	Culex	Melanoconion	dunni			Culex_dunni_PA 199	Mosquito	legs	Adult	France overseas	French Guiana	TissueLyser	Glass beads	-20°C		HCCA	4	COI	FGMOS2750-20	0.9954	1	MB20281
LT Microflex Bruker	Culex	Melanoconion	dunni			Culex_dunni_PA 204	Mosquito	legs	Adult	France overseas	French Guiana	TissueLyser	Glass beads	-20°C		HCCA	4	COI	FGMOS2748-20	0.9954	1	MB20279
LT Microflex Bruker	Culex	Melanoconion	dunni			Culex_dunni_PA 31	Mosquito	legs	Adult	France overseas	French Guiana	TissueLyser	Glass beads	-20°C		HCCA	4	COI	FGMOS2750-20	0.997	1	MB20281
LT Microflex Bruker	Culex	Melanoconion	dunni			Culex_dunni_TH 199	Mosquito	thorax	Adult	France overseas	French Guiana	TissueLyser	Glass beads	-20°C		HCCA	4	COI	FGMOS2750-20	0.9954	1	MB20281
LT Microflex Bruker	Culex	Melanoconion	dunni			Culex_dunni_TH 204	Mosquito	thorax	Adult	France overseas	French Guiana	TissueLyser	Glass beads	-20°C		HCCA	4	COI	FGMOS2748-20	0.9954	1	MB20279
LT Microflex Bruker	Culex	Melanoconion	dunni			Culex_dunni_TH 26	Mosquito	thorax	Adult	France overseas	French Guiana	TissueLyser	Glass beads	-20°C		HCCA	4	COI	FGMOS2750-20	0.997	1	MB20281
LT Microflex Bruker	Culex	Melanoconion	dunni			Culex_dunni_TH 31	Mosquito	thorax	Adult	France overseas	French Guiana	TissueLyser	Glass beads	-20°C		HCCA	4	COI	FGMOS2750-20	0.997	1	MB20281
LT Microflex Bruker	Culex	Melanoconion	eastor			Culex_eastor_PA 107	Mosquito	legs	Adult	France overseas	French Guiana	TissueLyser	Glass beads	-20°C		HCCA	4	COI	FGMOS2695-20	1	1	MB20226
LT Microflex Bruker	Culex	Melanoconion	eastor			Culex_eastor_TH 111	Mosquito	thorax	Adult	France overseas	French Guiana	TissueLyser	Glass beads	-20°C		HCCA	4	COI	FGMOS2743-20	0.9939	1	MB20274
LT Microflex Bruker	Culex	Melanoconion	idottus			Culex_idottus_TH 5	Mosquito	thorax	Adult	France overseas	French Guiana	TissueLyser	Glass beads	-20°C		HCCA	4	COI	FGMOS3098-23	0.9985	1	ST11913
LT Microflex Bruker	Culex	Culex	nigripalpus			Culex_nigripalpus_PA 20	Mosquito	legs	Adult	France overseas	French Guiana	TissueLyser	Glass beads	-20°C		HCCA	4	COI	FGMOS225-16	0.9985	1	MB20198
LT Microflex Bruker	Culex	Culex	nigripalpus			Culex_nigripalpus_PA 98	Mosquito	legs	Adult	France overseas	French Guiana	TissueLyser	Glass beads	-20°C		HCCA	4	COI	FGMOS225-16	0.9985	1	MB20198
LT Microflex Bruker	Culex	Culex	nigripalpus			Culex_nigripalpus_TH 14	Mosquito	thorax	Adult	France overseas	French Guiana	TissueLyser	Glass beads	-20°C		HCCA	4	COI	FGMOS225-16	1	1	MB20198
LT Microflex Bruker	Culex	Culex	nigripalpus			Culex_nigripalpus_TH 20	Mosquito	thorax	Adult	France overseas	French Guiana	TissueLyser	Glass beads	-20°C		HCCA	4	COI	FGMOS225-16	0.9985	1	MB20198
LT Microflex Bruker	Culex	Culex	nigripalpus			Culex_nigripalpus_TH 98	Mosquito	thorax	Adult	France overseas	French Guiana	TissueLyser	Glass beads	-20°C		HCCA	4	COI	FGMOS225-16	0.9985	1	MB20198
LT Microflex Bruker	Culex	Melanoconion	pedroi			Culex_pedroi_PA 174	Mosquito	legs	Adult	France overseas	French Guiana	TissueLyser	Glass beads	-20°C		HCCA	4	COI	FGMOS2700-20	0.9985	1	MB20231
LT Microflex Bruker	Culex	Melanoconion	pedroi			Culex_pedroi_PA 42	Mosquito	legs	Adult	France overseas	French Guiana	TissueLyser	Glass beads	-20°C		HCCA	4	COI	FGMOS2700-20	0.997	1	MB20231
LT Microflex Bruker	Culex	Melanoconion	pedroi			Culex_pedroi_TH 170	Mosquito	thorax	Adult	France overseas	French Guiana	TissueLyser	Glass beads	-20°C		HCCA	4	COI	FGMOS2700-20	0.9985	1	MB20231
LT Microflex Bruker	Culex	Melanoconion	pedroi			Culex_pedroi_TH 174	Mosquito	thorax	Adult	France overseas	French Guiana	TissueLyser	Glass beads	-20°C		HCCA	4	COI	FGMOS2700-20	0.9985	1	MB20231
LT Microflex Bruker	Culex	Melanoconion	pedroi			Culex_pedroi_TH 42	Mosquito	thorax	Adult	France overseas	French Guiana	TissueLyser	Glass beads	-20°C		HCCA	4	COI	FGMOS2700-20	0.997	1	MB20231
LT Microflex Bruker	Culex	Melanoconion	pedroi			Culex_pedroi_TH 48	Mosquito	thorax	Adult	France overseas	French Guiana	TissueLyser	Glass beads	-20°C		HCCA	4	COI	FGMOS2758-20	0.9985	1	MB20289
LT Microflex Bruker	Culex	Melanoconion	phlogistus			Culex_phlogistus_PA 122	Mosquito	legs	Adult	France overseas	French Guiana	TissueLyser	Glass beads	-20°C		HCCA	4	COI	FGMOS1542-20	0.9863	1	ST10657
LT Microflex Bruker	Culex	Melanoconion	phlogistus			Culex_phlogistus_TH 122	Mosquito	thorax	Adult	France overseas	French Guiana	TissueLyser	Glass beads	-20°C		HCCA	4	COI	FGMOS1542-20	0.9863	1	ST10657
LT Microflex Bruker	Culex	Melanoconion	portesi			Culex_portesi_PA 156	Mosquito	legs	Adult	France overseas	French Guiana	TissueLyser	Glass beads	-20°C		HCCA	4	COI	FGMOS2416-20	0.9985	1	ST11531
LT Microflex Bruker	Culex	Melanoconion	portesi			Culex_portesi_TH 156	Mosquito	thorax	Adult	France overseas	French Guiana	TissueLyser	Glass beads	-20°C		HCCA	4	COI	FGMOS2416-20	0.9985	1	ST11531
LT Microflex Bruker	Culex	Melanoconion	portesi			Culex_portesi_TH 159	Mosquito	thorax	Adult	France overseas	French Guiana	TissueLyser	Glass beads	-20°C		HCCA	4	COI	FGMOS2416-20	1	1	ST11531
LT Microflex Bruker	Culex	Melanoconion	portesi			Culex_portesi_TH 35	Mosquito	thorax	Adult	France overseas	French Guiana	TissueLyser	Glass beads	-20°C		HCCA	4	COI	FGMOS2416-20	1	1	ST11531
LT Microflex Bruker	Culex	Melanoconion	portesi			Culex_portesi_TH 39	Mosquito	thorax	Adult	France overseas	French Guiana	TissueLyser	Glass beads	-20°C		HCCA	4	COI	FGMOS2416-20	1	1	ST11531
LT Microflex Bruker	Culex	Culex	quinquefasciatus			Culex_quinquefasciatus_PA 309	Mosquito	legs	Adult	France overseas	French Guiana	TissueLyser	Glass beads	-20°C		HCCA	4	COI	FGMOS2275-20	1	1	ST11391
LT Microflex Bruker	Culex	Culex	quinquefasciatus			Culex_quinquefasciatus_PA 58	Mosquito	legs	Adult	France overseas	French Guiana	TissueLyser	Glass beads	-20°C		HCCA	4	COI	FGMOS2275-20	1	1	ST11391
LT Microflex Bruker	Culex	Culex	quinquefasciatus			Culex_quinquefasciatus_PA 66	Mosquito	legs	Adult	France overseas	French Guiana	TissueLyser	Glass beads	-20°C		HCCA	4	COI	FGMOS2275-20	1	1	ST11391
LT Microflex Bruker	Culex	Culex	quinquefasciatus			Culex_quinquefasciatus_PA 73	Mosquito	legs	Adult	France overseas	French Guiana	TissueLyser	Glass beads	-20°C		HCCA	4	COI	FGMOS2275-20	1	1	ST11391
LT Microflex Bruker	Culex	Culex	quinquefasciatus			Culex_quinquefasciatus_TH 309	Mosquito	thorax	Adult	France overseas	French Guiana	TissueLyser	Glass beads	-20°C		HCCA	4	COI	FGMOS2275-20	1	1	ST11391
LT Microflex Bruker	Culex	Culex	quinquefasciatus			Culex_quinquefasciatus_TH 58	Mosquito	thorax	Adult	France overseas	French Guiana	TissueLyser	Glass beads	-20°C		HCCA	4	COI	FGMOS2275-20	1	1	ST11391
LT Microflex Bruker	Culex	Culex	quinquefasciatus			Culex_quinquefasciatus_TH 66	Mosquito	thorax	Adult	France overseas	French Guiana	TissueLyser	Glass beads	-20°C		HCCA	4	COI	FGMOS2275-20	1	1	ST11391
LT Microflex Bruker	Culex	Culex	quinquefasciatus			Culex_quinquefasciatus_TH 73	Mosquito	thorax	Adult	France overseas	French Guiana	TissueLyser	Glass beads	-20°C		HCCA	4	COI	FGMOS2275-20	1	1	ST11391
LT Microflex Bruker	Culex	Melanoconion	rabanicolus			Culex_rabanicolus_PA 56	Mosquito	legs	Adult	France overseas	French Guiana	TissueLyser	Glass beads	-20°C		HCCA	4	COI	FGMOS2744-20	0.9954	1	MB20299
LT Microflex Bruker	Culex	Melanoconion	rabanicolus			Culex_rabanicolus_PA 7	Mosquito	legs	Adult	France overseas	French Guiana	TissueLyser	Glass beads	-20°C		HCCA	3	COI	FGMOS2744-20	0.9954	1	MB20275
LT Microflex Bruker	Culex	Melanoconion	rabanicolus			Culex_rabanicolus_TH 3	Mosquito	thorax	Adult	France overseas	French Guiana	TissueLyser	Glass beads	-20°C		HCCA	4	COI	FGMOS2744-20	0.9954	1	MB20275
LT Microflex Bruker	Culex	Melanoconion	rabanicolus			Culex_rabanicolus_TH 7	Mosquito	thorax	Adult	France overseas	French Guiana	TissueLyser	Glass beads	-20°C		HCCA	4	COI	FGMOS2744-20	0.9954	1	MB20275
LT Microflex Bruker	Culex	Melanoconion	spissipes			Culex_spissipes_PA 49	Mosquito	legs	Adult	France overseas	French Guiana	TissueLyser	Glass beads	-20°C		HCCA	4	COI	FGMOS2701-20	0.9909	1	MB20232
LT Microflex Bruker	Culex	Melanoconion	spissipes			Culex_spissipes_PA 54	Mosquito	legs	Adult	France overseas	French Guiana	TissueLyser	Glass beads	-20°C		HCCA	4	COI	FGMOS2701-20	0.9818	1	MB20232
LT Microflex Bruker	Culex	Melanoconion	spissipes			Culex_spissipes_TH 176	Mosquito	thorax	Adult	France overseas	French Guiana	TissueLyser	Glass beads	-20°C		HCCA	4	COI	FGMOS2701-20	0.9863	1	MB20232
LT Microflex Bruker	Culex	Melanoconion	spissipes			Culex_spissipes_TH 49	Mosquito	thorax	Adult	France overseas	French Guiana	TissueLyser	Glass beads	-20°C		HCCA	4	COI	FGMOS2701-20	0.9909	1	MB20232
LT Microflex Bruker	Culex	Melanoconion	spissipes			Culex_spissipes_TH 54	Mosquito	thorax	Adult	France overseas	French Guiana	TissueLyser	Glass beads	-20°C		HCCA	4	COI	FGMOS2701-20	0.9818	1	MB20232
LT Microflex Bruker	Culex	Culex	usquatus			Culex_usquatus_PA 80	Mosquito	legs	Adult	France overseas	French Guiana	TissueLyser	Glass beads	-20°C		HCCA	4	COI	FGMOS046-16	1	1	ST11400
LT Microflex Bruker	Culex	Culex	usquatus			Culex_usquatus_PA 88	Mosquito	legs	Adult	France overseas	French Guiana	TissueLyser	Glass beads	-20°C		HCCA	4	COI	FGMOS046-16	1	1	ST11400
LT Microflex Bruker	Culex	Culex	usquatus			Culex_usquatus_PA 92	Mosquito	legs	Adult	France overseas	French Guiana	TissueLyser	Glass beads	-20°C		HCCA	4	COI	FGMOS046-16	1	1	ST11400
LT Microflex Bruker	Culex	Culex	usquatus			Culex_usquatus_PA 96	Mosquito	legs	Adult	France overseas	French Guiana	TissueLyser	Glass beads	-20°C		HCCA	4	COI	FGMOS2284-20	1	1	ST11399
LT Microflex Bruker	Culex	Culex	usquatus			Culex_usquatus_TH 80	Mosquito	thorax	Adult	France overseas	French Guiana	TissueLyser	Glass beads	-20°C		HCCA	4	COI	FGMOS046-16	1	1	ST11400
LT Microflex Bruker	Culex	Culex	usquatus			Culex_usquatus_TH 88	Mosquito	thorax	Adult	France overseas	French Guiana	TissueLyser	Glass beads	-20°C		HCCA	4	COI	FGMOS046-16	1	1	ST11400
LT Microflex Bruker	Culex	Culex	usquatus			Culex_usquatus_TH 92	Mosquito	thorax	Adult	France overseas	French Guiana	TissueLyser	Glass beads	-20°C		HCCA	4	COI	FGMOS046-16	1	1	ST11400
LT Microflex Bruker	Culex	Culex	usquatus			Culex_usquatus_TH 96	Mosquito	thorax	Adult	France overseas	French Guiana	TissueLyser	Glass beads	-20°C		HCCA	4	COI	FGMOS2284-20	1	1	ST11399
